# Supplementary material
Source: PubMed Central journal article supplement (PMC5561448)
Supplement: Supp_Fig1.pdf [file Supp_Fig1.pdf]

## Supplementary Data

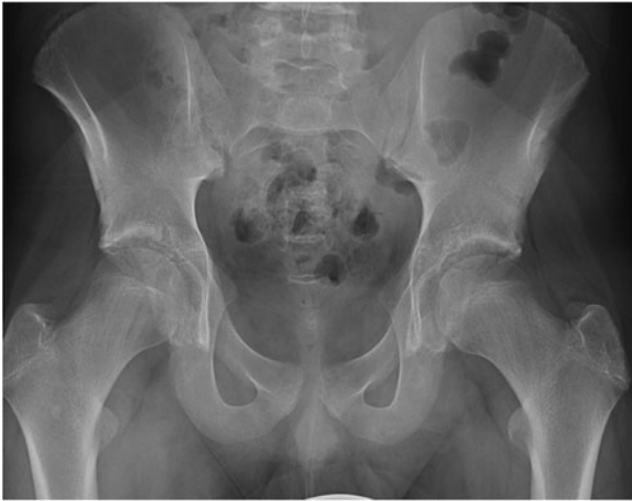

**SUPPLEMENTARY FIG. S1.** Pelvic radiograph in P1, age 17.1 years, showing normal femoral epiphyses.
