# Supplementary material
Source: PubMed Central journal article supplement (PMC5561448)
Supplement: Supp_Fig2.pdf [file Supp_Fig2.pdf]

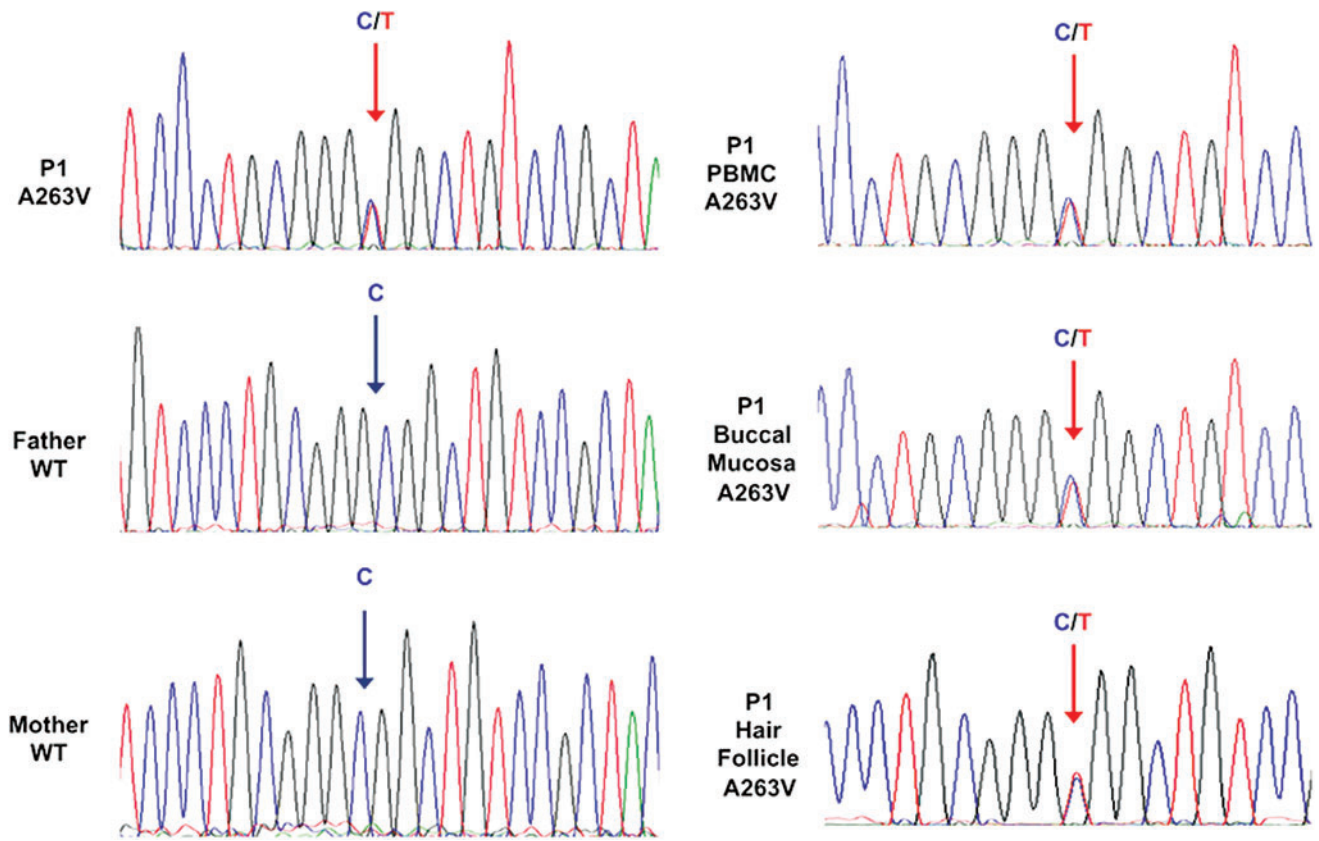

**SUPPLEMENTARY FIG. S2.** Electropherograms (left panel) showing heterozygosity for a single nucleotide substitution (C/T) in P1 or wild-type sequence (C) in his parents; the right panel indicates heterozygosity for this nucleotide change in DNA from peripheral blood mononuclear (top), buccal mucosal (middle), and hair follicle (bottom) cells.
