# Supplementary material
Source: PubMed Central journal article supplement (PMC5561448)
Supplement: Supp_Fig4.pdf [file Supp_Fig4.pdf]

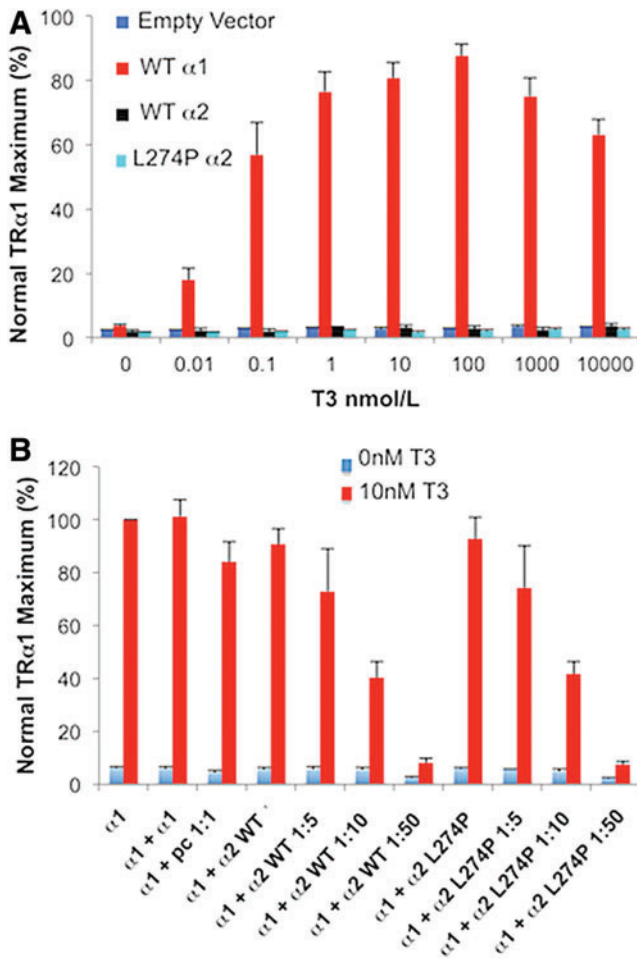

**SUPPLEMENTARY FIG. S4.** JEG-3 cells were transfected with empty, WT TR $\alpha$ 1 or TR $\alpha$ 2, or L274P mutant TR $\alpha$ 2 expression vectors together with a thyroid hormone responsive reporter gene assaying T3-dependent activation. Dominant negative inhibition by WT or L274P mutant TR $\alpha$ 2 was tested in JEG-3 cells cotransfected with reporter gene and combinations of expression vectors as indicated.
